# Supplementary material for: ST09, A Novel Curcumin Derivative, Blocks Cell Migration by Inhibiting Matrix Metalloproteases in Breast Cancer Cells and Inhibits Tumor Progression in EAC Mouse Tumor Models
Source: MDPI journal article supplement (doi:10.3390/molecules25194499), 2020-09-30
Supplement: s1 [file s1]

**Supplementary Materials:**

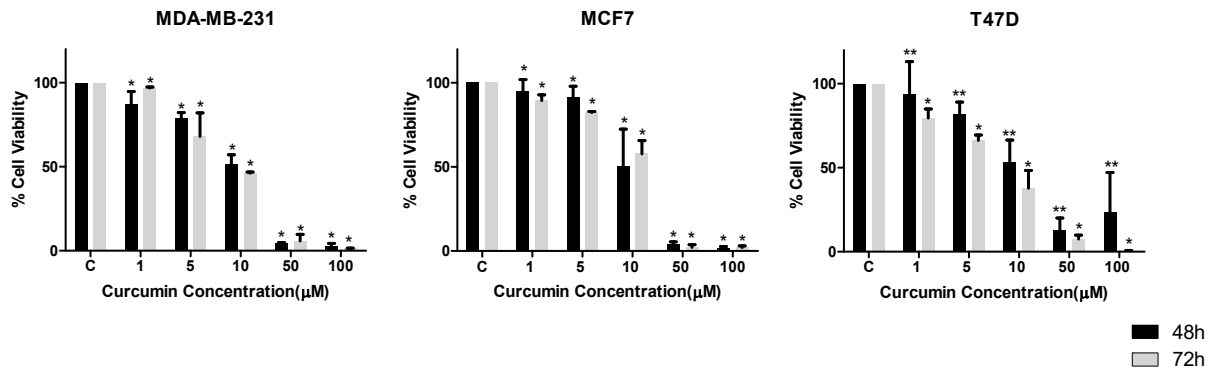

**Supplementary Figure 1: Evaluation of cell viability after Curcumin treatment by LDH Assay:** Bar graph depicting cell viability upon Curcumin treatment on 3 cell lines as tested by LDH assay. All experiments were performed a minimum of three times and the bar graph shows mean  $\pm$  SEM. Two-way ANOVA test was performed and p value was calculated between control and ST09 treated groups (\*p < 0.05, \*\*p < 0.005, \*\*\*p < 0.0001, \*\*\*\*p < 0.00001).

| <b>Curcumin</b>   |                  |
|-------------------|------------------|
|                   |                  |
| <b>Cell lines</b> | <b>IC50 (uM)</b> |
| MDA-MB-231        | 10.53            |
| MCF7              | 13.95            |
| T47D              | 10.17            |

**Supplementary Table 1: Structure of Curcumin and IC50 values for the breast cancer cells are tabulated for 48h treatment**
